# Supplementary material for: An Efficient Strategy for Small-Scale Screening and Production of Archaeal Membrane Transport Proteins in Escherichia coli
Source: PubMed Central journal article supplement (PMC3838208; doi:10.1371/journal.pone.0076913), 2013-10-07
Supplement: pone.0076913.s001.pdf [file pone.0076913.s001.pdf]

| Gene (Family)    | Vector    | Restriction digestion of vector | Primers 5' to 3'<br>Downstream and upstream (top and bottom)                                               |
|------------------|-----------|---------------------------------|------------------------------------------------------------------------------------------------------------|
| SSO2938 (MFS)    | pTTQ18    | <i>NdeI, PstI</i>               | CCGGAATTCGCATATGGTCTCAGAGAAACTAAG<br>AAA <u>ATGCAG</u> CATATTCCTGCTTCAGTATTTCTTCTCCTT                      |
|                  | pET52b(+) | <i>XmaI, SacI</i>               | TCCC <u>CCCGG</u> GATGGTCTCAGAGAAACTAAGGCTATAAT<br>TAT <u>GAGCT</u> CATATTCCTGCTTCAGTATTTCTT               |
|                  | pWarf(-)  | <i>XhoI, BamHI</i>              | CCG <u>CTCGAG</u> ATGGTCTCAGAGAAACTAAGGCTATAAT<br>CG <u>GGATCC</u> ATATTCCTGCTTCAGTATTTCTT                 |
| SSO2528 (MFS)    | pTTQ18    | <i>NdeI, PstI</i>               | GGGAATTCATATGAAAGATGAACTAAAGTTTCCATAGC<br>CCA <u>ATGCAT</u> CCCTTACTCTTTCCTGCCCTTCAAATA                    |
|                  | pET52b(+) | <i>XmaI, SacI</i>               | TCCC <u>CCCGG</u> GATGAAAGATGAACTAAAGTTTCCATAGC<br>TAT <u>GAGCT</u> CCCTTACTCTTTCCTGCCCTTCAAAT             |
|                  | pWarf(-)  | <i>XhoI, BamHI</i>              | CCG <u>CTCGAG</u> ATGAAAGATGAACTAAAGTTTCC<br>CG <u>GGATCC</u> CCCTTACTCTTTCCTGCCCTTCAAATA                  |
| SSO2042 (NCS1)   | pTTQ18    | <i>EcoRI, PstI</i>              | CCG <u>CAATTG</u> GCATATGTCAGAACAAGAAATAAACCCAC<br>AAA <u>ATGCAG</u> CAGGTTCCATTTTCACTTCTC                 |
|                  | pET52b(+) | <i>XmaI, SacI</i>               | TCCC <u>CCCGG</u> GATGTCAGAACAAGAAATAAACCCAC<br>TAT <u>GAGCT</u> CAGGTTCCATTTTCACTTCTTTTT                  |
|                  | pWarf(-)  | <i>XhoI, BamHI</i>              | CCG <u>CTCGAG</u> ATGTCAGAACAAGAAATAAACCCACGTTAAT<br>CG <u>GGATCC</u> CAGGTTCCATTTTCACTTCTTTTT             |
| SSO1665 (NCS1)   | pTTQ18    | <i>EcoRI, PstI</i>              | CCG <u>CAATTG</u> GCATATGACTGGAAAGGAGAAATTAGCTCAAATAACG<br>CCA <u>ATGCAT</u> CTCTTAATATCCCCCTTCATAGTTAAACG |
|                  | pET52b(+) | <i>XmaI, SacI</i>               | TCCC <u>CCCGG</u> GATGACTGGAAAGGAGGAAATTAGCTCAAATA<br>TATGAGCTCTCTTAATATCCCCCTTCATAGTTAAACG                |
|                  | pWarf(-)  | <i>XhoI, BamHI</i>              | CCG <u>CTCGAG</u> ATGACTGGAAAGGAGGAAATTAGCTCAAATA<br>CG <u>GGATCC</u> CTCTTAATATCCCCCTTCATAGTTAAA          |
| Saci2039 (NCS1)  | pTTQ18    | <i>EcoRI, PstI</i>              | CCGGAATTCGCATATGGAAGGAAAAAAGTAAAGA<br>AAA <u>ATGCAG</u> CTGATAATCTCCACCTTTATAAGTGTA                        |
|                  | pET52b(+) | <i>XmaI, SacI</i>               | TCCC <u>CCCGG</u> GATGGAAGGAAAAAAGTAAAGAGG<br>TAT <u>GAGCT</u> TGATAATCTCCACCTTTATAAG                      |
|                  | pWarf(-)  | <i>XhoI, BamHI</i>              | CCG <u>CTCGAG</u> ATGGAAGGAAAAAAGTAAAG<br>CG <u>GGATCC</u> TGATAATCTCCACCTTTATAAGTGTA                      |
| MA1518 (NSS)     | pTTQ18    | <i>EcoRI, PstI</i>              | CCG <u>CAATTG</u> GCATATGGTGGCGAGAGAAGTCTGGAACA<br>CCA <u>ATGCAT</u> CCCTTACCTCCCTGTTGATAAAAAGGC           |
|                  | pET52b(+) | <i>BamHI, SacI</i>              | CG <u>GGATCC</u> GATGGTGGCGAGAGAAGTCTGGAACACCAGAGT<br>TAT <u>GAGCT</u> CTTACCTCCCTGTTGATAAAAAGGCCTAAGGAT   |
|                  | pWarf(-)  | <i>XhoI, BamHI</i>              | CCG <u>CTCGAG</u> ATGGTGGCGAGAGAAGTCTGGAACA<br>CG <u>GGATCC</u> CTTACCTCCCTGTTGATAAAAAG                    |
| MJ1319 (NSS)     | pTTQ18    | <i>EcoRI, PstI</i>              | CCGGAATTCGCATATGAGTTATATGGAAGAGAAAAGCTG<br>AAA <u>ATGCAG</u> CCCAACCTTTAATCGTTTTTCAT                       |
|                  | pET52b(+) | <i>XmaI, NotI</i>               | TCCC <u>CCCGG</u> GATGAGTTATATGGAAGAGAAAAGCTG<br>AAGAAAAAAG <u>CGGCCGCC</u> CAACCTTTAATCGTTTTTCAT          |
|                  | pWarf(-)  | <i>XhoI, BamHI</i>              | CCG <u>CTCGAG</u> ATGAGTTATATGGAAGAGAAAAGCTG<br>CG <u>GGATCC</u> CCCAACCTTTAATCGTTTTTCATT                  |
| Mevan1511 (NCS2) | pTTQ18    | <i>EcoRI, PstI</i>              | CCGGAATTCGCATATGAAAAGAATAGTATTGGGTTTTCAA<br>CCA <u>ATGCAT</u> CTTTTTTAATATCTGATCCA                         |
|                  | pET52b(+) | <i>XmaI, SacI</i>               | TCCC <u>CCCGG</u> GATGAAAAGAATAGTATTGGGTTTTCAAC<br>TAT <u>GAGCT</u> CTTTTTTAATATCTGATCCATCAATATTGC         |
|                  | pWarf(-)  | <i>XhoI, BamHI</i>              | CCG <u>CTCGAG</u> ATGAAAAGAATAGTATTGGGTT<br>CG <u>GGATCC</u> CCCTCAACACCTGCTTAACACAATA                     |
| MMP0681 (NCS2)   | pTTQ18    | <i>EcoRI, PstI</i>              | CCGGAATTCGCATATGAAAAGAATAGCACTAGGTTTCCA<br>CCA <u>ATGCAT</u> CTTTTTTAACAACCTGGTCCATTAATATTGCG              |
|                  | pET52b(+) | <i>XmaI, SacI</i>               | TCCC <u>CCCGG</u> GATGAAAAGAATAGCACTAGGTTTCCA<br>TAT <u>GAGCT</u> CTTTTTTAACAACCTGGTCCATT                  |
|                  | pWarf(-)  | <i>XhoI, BamHI</i>              | CCG <u>CTCGAG</u> ATGAAAAGAATAGCACTAGGTTTCC<br>CG <u>GGATCC</u> TTTTTTTAACAACCTGGTCCATT                    |
| Hbor39700 (MFS)  | pTTQ18    | <i>NdeI, PstI</i>               | GGGAATTCATATGTCAACCTCTAATATACAGGACATTCT<br>CCA <u>ATGCAT</u> CGTCGTCGGCGGTGCGATATTCTT                      |
|                  | pET52b(+) | <i>XmaI, SacI</i>               | TCCC <u>CCCGG</u> GATGTCAACCTCTAATATACAGGACATTCT<br>TAT <u>GAGCT</u> CGTCGTCGGCGGTGCGATGCGATATTCT          |
|                  | pWarf(-)  | <i>EcoRI, BamHI</i>             | CCG <u>CAATTG</u> CCATGTCAACCTCTAATATACAGGACATTCT<br>CG <u>GGATCC</u> GTGTCGTCGGCGGTGCGATGCGATATTCT        |

|                   |           |                       |                                                                                                                      |
|-------------------|-----------|-----------------------|----------------------------------------------------------------------------------------------------------------------|
| AF2014<br>(MFS)   | pTTQ18    | <i>NdeI, PstI</i>     | GGGAATTCATATGGGTGAATTCTCCAAGTTGAGAAAC<br>AAAA <u>CTGCAG</u> CAAACTCCTCCAGCTCTCTCCCTT                                 |
|                   | pET52b(+) | <i>XmaI, SacI</i>     | TCCCCCGGGATGGGTGAATTCTCCAAGTTGAGAAACTA<br>TAT <u>GAGCTC</u> AAACTCCTCCAGCTCTCTCCCTTCGTTTC                            |
|                   | pWarf(-)  | <i>XhoI, BamHI</i>    | CCGCTCGAGATGGGTGAATTCTCCAAGTTGAGAAACTA<br>CGC <u>GATCC</u> AAACTCCTCCAGCTCTCTCCCTTCGTTTC                             |
| Ta0252<br>(MFS)   | pTTQ18    | <i>EcoRI, PstI</i>    | CCGGAATTCGCATATGGAAAATGGAGTCAGATATCCGAT<br>AAAA <u>CTGCAG</u> CTTTTCGGGTCTGCTGGAACGCTCTCCTT                          |
|                   | pET52b(+) | <i>XmaI, SacI</i>     | TCCCCCGGGATGGAAAATGGAGTCAGATATCCGAT<br>TAT <u>GAGCTC</u> TTTCGGGTCTGCTGGAACGCTCTCCTT                                 |
|                   | pET52b(+) | <i>XhoI, BamHI</i>    | CCGCTCGAGATGGAAAATGGAGTCAGATATCCG<br>CGC <u>GATCC</u> TTTCGGGTCTGCTGGAACGCTCTCCTTCTT                                 |
| Msed1117<br>(MFS) | pTTQ18    | <i>EcoRI, PstI</i>    | CCGGAATTCGCATATGGTTATCAAGAGTAATCCAGACAAGG<br>AAAA <u>CTGCAG</u> CTCTAAATCTATCAGTTATTTCTTCTA                          |
|                   | pET52b(+) | <i>XmaI, SacI</i>     | TCCCCCGGGATGGTTATCAAGAGTAATCCAGACAA<br>TAT <u>GAGCTC</u> TCTAAATCTATCAGTTATTTCT                                      |
|                   | pWarf(-)  | <i>XhoI, BamHI</i>    | CCGCTCGAGATGGTTATCAAGAGTAATCCAGACAA<br>CGC <u>GATCC</u> TCTAAATCTATCAGTTATTTCTT                                      |
| pNG7043<br>(MFS)  | pTTQ18    | <i>EcoRI, HindIII</i> | CCGGAATTCGCATATGTCCACAGCGACCATACGTAAAC<br>CCC <u>AAGCTT</u> CTATTAATGGTGATGGTGATGGTGGCTGCCACGGTCAGCCAGTGAGATGTTCTGCG |
|                   | pET52b(+) | <i>BamHI, SacI</i>    | CGC <u>GATCC</u> GATGTCCACAGCGACCATACGTAAAC<br>TAT <u>GAGCTC</u> GTTCAGCCAGTGAGATGTTCTGCG                            |
|                   | pWarf(-)  | <i>EcoRI, BamHI</i>   | CCGGAATTCGCATATGTCCACAGCGACCATACGTAA<br>CGC <u>GATCC</u> GTTCAGCCAGTGAGATGTTCTGCCGAGGTC                              |
| Saci1848<br>(MFS) | pTTQ18    | <i>EcoRI, PstI</i>    | CCGGAATTCGCATATGAGGAACAATACCACTAAC<br>AAAA <u>CTGCAG</u> CTATTTTCTCTAAATTCACATTAT                                    |
|                   | pET52b(+) | <i>XmaI, SacI</i>     | TCCCCCGGGATGAGGAACAATACCACTAACG<br>TAT <u>GAGCTC</u> TATTTTCTCTAAATTCACATTATTAGT                                     |
|                   | pWarf(-)  | <i>XhoI, BamHI</i>    | CCGCTCGAGATGAGGAACAATACCACTAACGTGAT<br>CGC <u>GATCC</u> TATTTTCTCTAAATTCACATTATTAGT                                  |

---
